# Supplementary material for: Mechanism of cancer-associated fibroblast-driven thyroid cancer dedifferentiation via the ZFP57-PKM2 axis-mediated lactate secretion and therapeutic intervention with Resveratrol
Source: Research Square preprint supplement (doi:10.21203/rs.3.rs-7685041/v1), 2025-10-26
Supplement: Supplementary file 1 [file 423a4226a60ad6b09fd9d60e.docx]

Methods

Supplementary Materials and Methods

**Cell Culture**

The human PTC-derived K1 cell line was obtained from the European Collection of Authenticated Cell Cultures (ECACC). Human PTC-derived BCPAP, IHH4, and TPC1 cell lines were acquired from the National Collection of Authenticated Cell Cultures (Shanghai, China). The culture medium for BCPAP cells consisted of 44 mL RPMI 1640 basal medium, 0.5 mL non-essential amino acids, 0.5 mL sodium pyruvate, and 5 mL fetal bovine serum (FBS). IHH4 cells were cultured in a 1:1 mixture of 45 mL DMEM and RPMI 1640 supplemented with 5 mL FBS. K1 cells were maintained in a 2:1:1 mixture of 45 mL DMEM, Ham’s F12, and MCDB medium with 5 mL FBS. TPC1 cells were cultured in 45 mL DMEM mixed with 5 mL FBS.

**Tissue Morphology Interpretation**

**Visium Spatial Tissue Optimization Protocol**

Spatial gene expression data for formalin-fixed paraffin-embedded (FFPE) tissues were obtained following the 10x Genomics protocols (CG000408, CG000409, and CG000407) for tissue preparation and library construction. Briefly, tissues were dewaxed, stained, and decrosslinked. Human whole transcriptome probe panel v1 was then hybridized to the dewaxed, stained, and decrosslinked tissues. Post-hybridization, probes were ligated, and ligation products were treated with RNase and permeabilized to release probes from the tissue. Ligated probe products were captured by spatially barcoded oligonucleotides and extended. Final libraries were generated from extended probes. Library concentration and quality were assessed using Qubit and Agilent TapeStation. Sequencing was performed on the Illumina NovaSeq 6000 platform with 28-bp reads for spatial barcodes and unique molecular identifiers (UMIs), and 50-bp reads for probe sequences.

**Demultiplexing and Gene Count Matrix Generation**

The Space Ranger software suite (v2.0.0) was used for gene expression alignment and quantification. Demultiplexing assigned spatial barcodes to reads. BCL files were converted to FASTQ format using Space Ranger mkfastq(), with low-quality reads filtered out. Sequencing data were aligned to the human reference genome (GRCh38) using the Space Ranger count module, with GENCODE v.32 as the gene annotation reference. Output matrices included UMI counts and gene expression counts per spatial barcode, corresponding to tissue regions with 55-μm diameter spots and 100-μm center-to-center spacing.

**Visium-Based Spatial Transcriptomics (ST) Data Analysis**

All spatial transcriptomics analyses were performed using Python (v3.10.14) and R (v4.3.3).

**Quality Control and Filtering**

Quality control and filtering were conducted using the Python package Scanpy (v1.9.7) for large-scale single-cell RNA-seq data. Filtering criteria included: 1) total counts per spot between 2,000 and 35,000; 2) genes detected in ≥10 spots; and 3) mitochondrial gene expression <20% per spot. High-quality spots were retained for downstream analyses.

**Batch Effect Correction and Cell Annotation**

Batch effects from three patient-derived datasets were corrected using the BBKNN algorithm (v1.6.0). Cell types were annotated using established marker genes, classifying spots into seven categories: fibroblasts (COL1A2, PDGFRB, RGS5), T cells (CD3E, CD3D, NKG7), B cells (MS4A1, CD79A, IGHG1), epithelial cells (EPCAM, CLU, TG), myeloid cells (FCER1G, CSF1R, LST1), progenitor cells (MKI67, TOP2A, STMN1), and endothelial cells (RAMP2, VWF, PTPRB).

**Plasmid Construction, Cell Transfection, and Lentiviral Infection**

Short hairpin RNAs (shRNAs) targeting ZFP57, SPIB, ZNF501, MCT1, and MCT4 were designed and cloned into lentiviral vectors. Non-targeting shRNA (Lv-NC) served as a negative control (Obio Technology). For ZFP57 overexpression, full-length coding sequences were cloned into lentiviral vectors (LV-ZFP57), with empty vectors as controls (Obio Technology, Shanghai, China). shRNA sequences are listed in Additional file 1（Table S1）

**Total RNA Isolation and qRT-PCR**

Total RNA was extracted using RNAiso (Takara, Dalian, China) and reverse-transcribed into cDNA with the PrimeScript RT Reagent Kit (RR036A, Takara, Japan). qRT-PCR was performed using SYBR Premix Ex TaqII (Takara) on a LightCycler 480 system (Roche, USA). Amplification conditions: 95°C for 30 sec, followed by 50 cycles of 95°C for 5 sec and 60°C for 30 sec, with dissociation at 95°C (60 sec), 55°C (60 sec), and 95°C (30 sec). miRNA primers were included in the Mir-X miRNA First-Strand Synthesis Kit (638313, Takara). Relative expression was calculated using the 2^−ΔCT method, with GAPDH and U6 as internal controls. Primer sequences are listed in Additional file 1（Table S2）.

**Western Blotting**

Total protein was extracted using lysis buffer, and concentrations were measured with a BCA Protein Assay Kit (Beyotime, China). Proteins were separated by 10% or 12% SDS-PAGE and transferred to PVDF membranes (Bio-Rad, USA). Membranes were blocked with 5% non-fat milk for 2 hr, incubated with primary antibodies at 4°C overnight, and then with HRP-conjugated secondary antibodies (1:20,000) for 2 hr. Protein bands were visualized using an enhanced chemiluminescence system.Antibody brands are listed in Additional File 1 (Table S3).

**Cell Proliferation Assay**

Cell proliferation was assessed using the CCK-8 Kit (Dojindo, Japan). Cells (2×10^3/well) were seeded in 96-well plates. After treatment, 10 μL CCK-8 reagent was added to each well at 0, 24, 48, and 72 hr, followed by 3 hr incubation at 37°C. Absorbance at 450 nm was measured to quantify viable cells.

**Transwell Invasion Assay**

Cells (5×10^5/mL) in serum-free medium were seeded into Transwell upper chambers. The lower chamber contained 0.6 mL medium with 10% FBS. After 24 hr, invasive cells on the membrane underside were fixed with 4% paraformaldehyde, stained with 0.1% crystal violet, and counted microscopically.

**Immunofluorescence (IF)**

Cancer-associated fibroblasts (CAFs) were identified by α-smooth muscle actin (α-SMA) expression. Cells were fixed, permeabilized, and stained with anti-α-SMA antibody (1/500, ab5694, Abcam, UK) and HRP-conjugated secondary antibody (1/2000, ab205718, Abcam).

**Multiplex Immunofluorescence (mIF)**

Cells grown on coverslips were fixed, permeabilized with 0.5% Triton X-100, and blocked with 5% BSA. Primary antibodies (1:200 dilution) were applied overnight at 4°C, followed by species-specific secondary antibodies and DAPI nuclear staining. Images were acquired using fluorescence microscopy.
